# Supplementary material
Source: PubMed Central journal article supplement (PMC3680789)
Supplement: NIHMS464886-supplement-1.pdf [file NIHMS464886-supplement-1.pdf]

## Supplementary Information

### CGE analysis

In the standard GCR assay, expression of both *CAN1* and *URA3* must be lost to generate clones that will grow on plates containing 5-FOA and canavanine (FOA+Can). After standard GCR events, these genes are not expressed because they are physically lost by *de novo* telomere addition or non-reciprocal translocation or large deletion. However, PCR and Southern analysis demonstrated that telomere addition was not common, and *URA3* and *CAN1* were present at their original locations in many *pif1-m2* + G4 and *pif1-m2 rrm3Δ* + G4 (and some *pif1-m2 rrm3Δ*) clones. To determine if genes were mutated, the genes and ~200 bp of their up- and downstream flanking sequences were cloned and sequenced. Similar analyses of 11 independent *sgs1Δ* + G4 GCR clones showed that *CAN1* and *URA3* were missing (data not shown), suggesting that the *pif1-m2* + G4, *pif1-m2 rrm3Δ* + G4, and *pif1-m2 rrm3Δ* silencing of *CAN1* and *URA3* is enhanced by lack of nuclear Pif1 function and a nearby G4 motif. To investigate this phenomenon in more detail, we tested all of the markers (*URA3*, *CAN1*, and *LEU2*, which marks the G4 motif) in the parental GCR strains and found that the WT, *pif1-m2*, *sgs1Δ*, and *pif1-m2 rrm3Δ* strains all grew on –Ura medium (and those with the G4 insert grew on –Leu medium) but not on media containing FOA, Can, or both (data not shown). Thus, before the GCR assay, all of the markers functioned as expected. Similar plating assays with the post-GCR *pif1-m2* + G4, *pif1-m2 rrm3Δ* + G4, and *pif1-m2 rrm3Δ* clones demonstrated that they grew on FOA, Can, and FOA+Can plates, as well as on –Ura (data not shown), despite the presence of WT *URA3* and *CAN1*. Together, the above data suggest that either transcription or translation of *URA3* is silenced, and this silencing is

somehow related to lack of nuclear Pif1 and the presence of the G4 insert. As a control for this hypothesis, we characterized the rare GCR events that occur in the *pif1-m2* “no insert” strain that were not due to telomere addition and found that the *CAN1* and *URA3* markers were missing, not silenced.

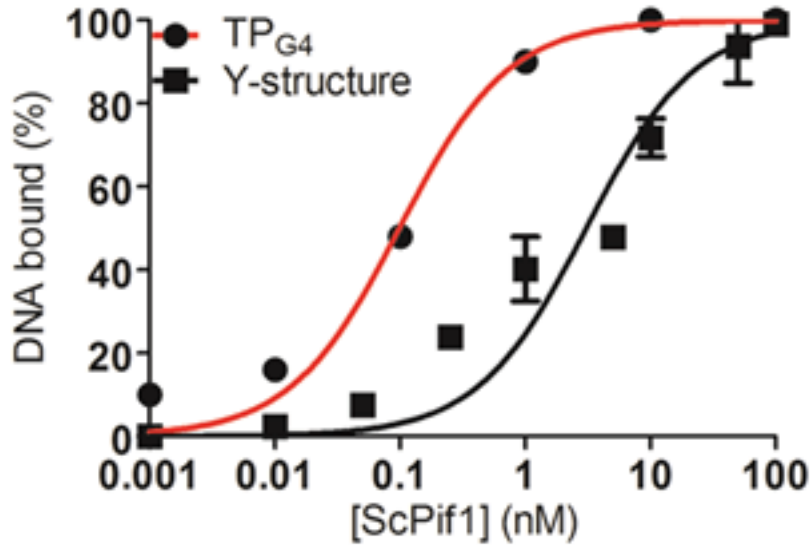

**Supplementary Figure 1.** Binding of the TP<sub>G4</sub> and Y-structure substrates (0.1 nM) as a function of [ScPif1]. Error bars here and in all subsequent figures correspond to one standard deviation of the mean from  $\geq 3$  independent experiments.

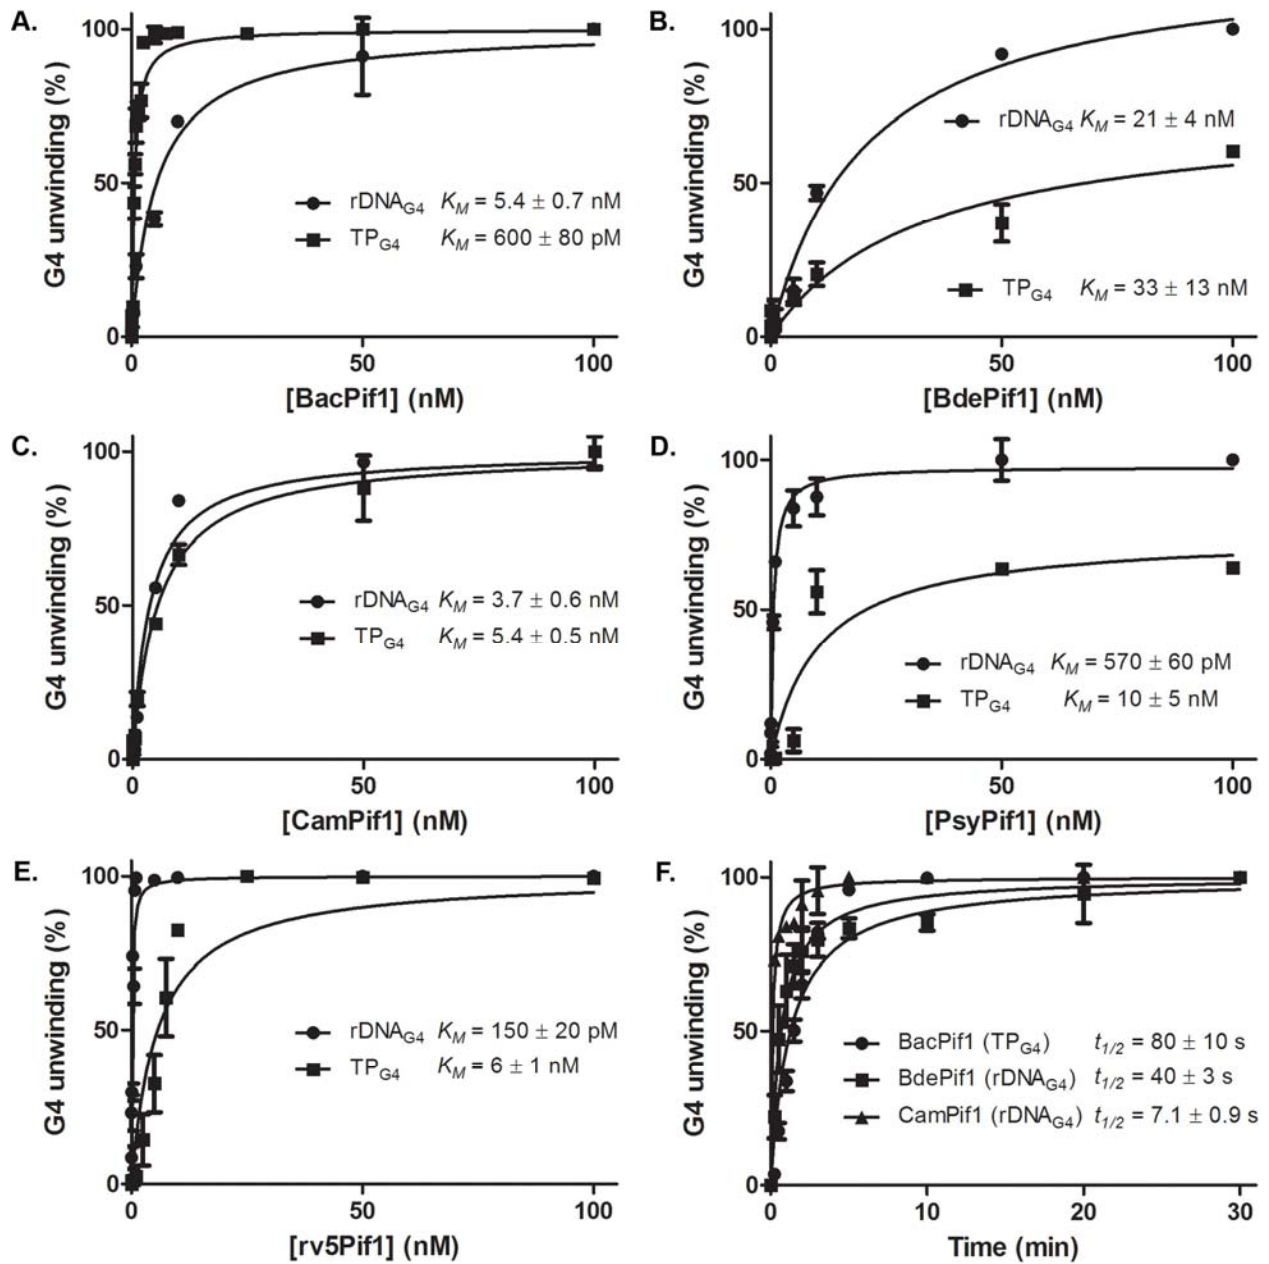

**Supplementary Figure 2.** Prokaryotic Pif1 G4 DNA helicase assays. Unwinding of the rDNA<sub>G4</sub> and TP<sub>G4</sub> substrates (0.1 nM) as a function of the concentration of (a) BacPif1, (b) BdePif1, (c) CamPif1, (d) PsyPif1, and (e) rv5Pif1. The apparent  $K_M$ s represent the midpoints of the protein titration curves. (f) Time course analyses of G4 DNA unwinding by the BacPif1, BdePif1, and CamPif1 helicases. The rates of BacPif1, BdePif1, and CamPif1 G4 unwinding are 38, 75, and 420 pM G4/min.

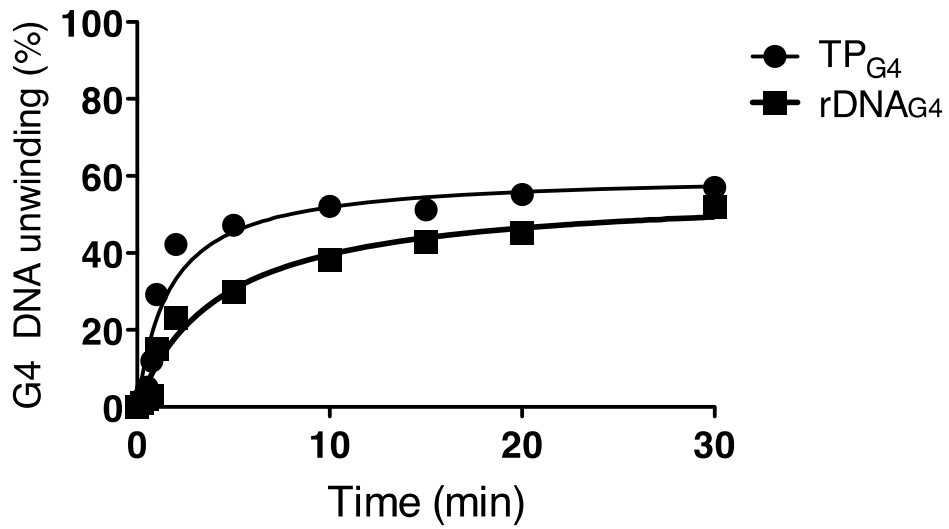

**Supplementary Figure 3.** hWRN G4 DNA helicase assays. Time course of the unwinding of the TP<sub>G4</sub> and rDNA<sub>G4</sub> substrates (100 pM) by 100 nM hWRN at 37°C. There are no error bars because the data are the average of two independent experiments.

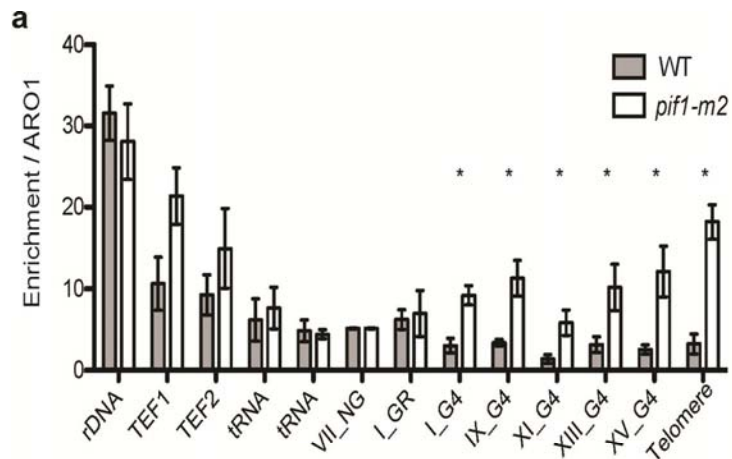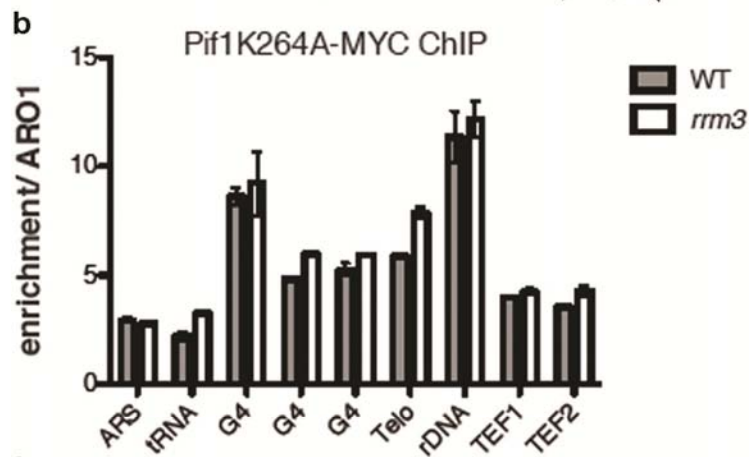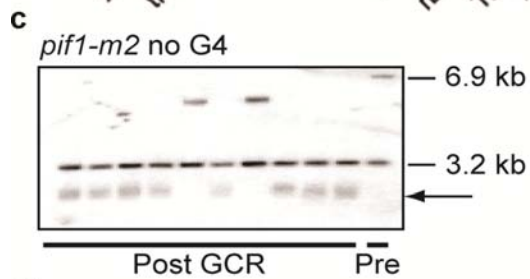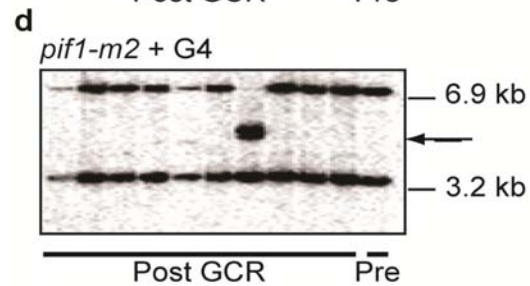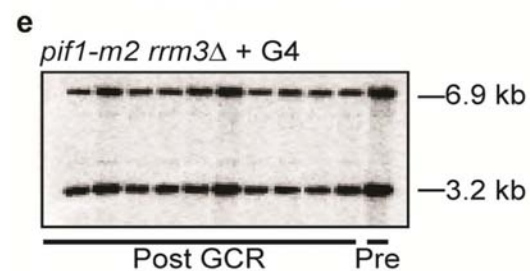

**Supplementary Figure 4.** Increased Rrm3 binding to G4 motifs in the absence of ScPif1 and types of GCR events. **(a)** Rrm3-Myc binding to five G4 motifs and eight non-G4 motifs in WT (gray) and *pif1-m2* (white) cells. Binding was normalized to input DNA and *ARO1*. \* indicates a statistically significant difference ( $p < 0.0014$ ) in Rrm3 binding in *pif1-m2* vs. WT cells as calculated by the Student's *t*-test. **(b)** ChIP-qPCR analysis of Pif1-K264A binding in WT (grey bars) and *rrm3Δ* (white bars) cells. Pif1-K264A was C-terminally tagged at its endogenous locus with 13 Myc epitopes as described<sup>19</sup>. Pif1-K264A binding was measured at three candidate G4 motifs, two non-G4 Pif1 binding sites (rDNA; and telomere VI-R, Telo), and four Rrm3-dependent sites (*tRNA*, *ARS*, *TEF1*, and *TEF2*) (Rrm3 dependent sites are places where replication pauses in the absence of Rrm3<sup>18</sup>). Values were normalized to both input and the amount of *ARO1* DNA in the immunoprecipitate and are not significantly different by the Student's *t*-test. **(c-e)** Southern blot analyses of *AlwNI*-digested DNA from independent GCR clones from **(c)** *pif1-m2*, **(d)** *pif1-m2*+G4, and **(e)** *pif1-m2 rrm3Δ*+G4 cells. Blots were digested with *AlwNI* and probed with *CIN8* (primer pair 3 from A). In d, e, and f, 8/10, 1/10, and 0/10 clones display apparent telomere additions ("fuzzy" bands, arrow). See Supplementary Information for an explanation of the banding pattern. The banding pattern for the *pif1-m2 rrm3Δ* clones containing no G4 insert looks similar to f (data not shown), but the silencing phenotype of the cells is not the same. The lack of telomere addition in the *pif1-m2 rrm3Δ* strains with or without a G4 insert is consistent with the previous finding that *rrm3Δ* suppresses *pif1* telomere addition<sup>26</sup>.

Chr X G4 TCTAGA...ATAATGGGTCCTCCAAGCGGTAAAACCTTACATGGG---ATGGTGGGGTCACATGGGTGGTC...GGATCC original sequence

*sgs1* TCTAGA...ATAATGGGTCCTCCAAGCGGTAAAACCTTACATGGG---ATGGTGGGGTCACATGGGTGGTC...GGATCC no change

*pif1-m2* GGATCC...A-----C-T--A-G---T-----...TCTAGA deletion/flipped  
TCTAGA...-----GCGTTGTAAATGTTGGTACCCAAACCA---ATTGTC-----TACAAGTT-TC...GGATCC recombined with *PMA1*  
TCTAGA...A-A-T-----A-G-GG-----G-----T-T----C-C-G---AA...GGATCC deletion  
TCTAGA...AGTTGGGGTTCTGATAACAATCACAAATTCGTCGG---TTGGTTGACCGTTGGTACCGGTG...GGATCC insertion  
TCTAGA...AGTAGGGGTTCCGAAAGATCCGGTCATTCGTCGG---TNGGTTGAACGATGGTACCGGTG...GGATCC insertion  
TCTAGA...GGTAGGAGTC-TCC---C-TA----T-CA-G-----T-----AC----- deletion

*rrm3* TCTAGA...ATAATGGGTCCTCCAAGCGGTAAAACCTTACATGGG---ATGGTGGGGTCACATGGGTGGTC...GGATCC no change  
TCTAGA...GTAATGGACCC-----ATGTGTCTAGG---A-----GTT-----TC...GGATCC deletion/mutation  
TCTAGA...AGTTGGAGTCCCCCAGCGGTAAAAGGGTTCCGA---AGGTCGGGGTCACTTGGGTGGTC...GGATCC mutation/insertion

*pif1-m2 rrm3* GGATCC...GTAT-----CGATAAGCTTGATATCGA---AT-----TC...TCTAGA deletion/flipped?  
TCTAGA...NGTTGTAGTCCTCCCATCAGTAAAAGGGTTCCGA---AGGCNGGGGTCATTTGGGTGGTC...GGATCC insertion  
TCTAGA...AGATGGAGTCCTCCCTTCGGTAAAAGGGTTTGGA---AGGGTGGGGTCACTTGGGTGGTC...GGATCC mutation  
TCTAGA...ATAATGGGTCCTCCAAGCGGTAAAACCTTACATGGG---ATGGTGGGGTCACATGGGTGGTC...GGATCC mutation  
GGATCC...A-----C-T--A-G---T-----...TCTAGA deletion/flipped?

Chr I G4 TCTAGA...GGAATCCCAACAATTATCTCAAAATTCCCCCAATTCTCATCA--GTAACACCCCCCCCGTATT...GGATCC original sequence

*sgs1* TCTAGA...GGAATCCCAACAATTATCTCAAAATTCCCCCAATTCTCATCA--GTAACACCCCCCCCGTATT...GGATCC no change

*pif1-m2* TCTAGA...GTGAGCGGGGATAACAATTTACACAGGAAACAGCTATGACCATGATTACGNCAAGCTCGAAATT...GGATCC mutation/insertion  
TCTAGA...GGTACCCAAAC-----CCAATTGTCTACAAGTTTCTTAA--GCAATACC-----...GGATCC recombined with *PMA1*  
TCTAGA...GGTA---AAGAA-----CCAAATTGTC-----TACT...GGATCC deletions/mutations  
TCTAGA...GGAACCCCAG-----TCCATGGTT-----CAGG...GGATCC deletions/mutations  
TCTAGA...ACCAGTCCAA-----GTTTCTC-----TGTG...GGATCC deletions/mutations  
TCTAGA...ACNAGGCCAT-----GTTTCTC-----TGTG...GGATCC deletions/mutations

*rrm3* TCTAGA...GGTACCCAAAC-----CCAATTGTCTACAAGTTTCTTAA--GCAATACC-----...GGATCC recombined with *PMA1*  
TCTAGA...GGTACCCAAAC-----CCAATTGTCTACAAGTTTCTTAA--GCAATACC-----...GGATCC recombined with *PMA1*

*pif1-m2 rrm3* TCTAGA...GGA---TAACAATTTACACAGGAAACAGCTATGACCATGA--TTA-CGCCAAGCTCGAAATT...GGATCC mutations/deletions  
TCTAGA...GGTTCTTGTGGGNTGGAGTCCCCCTTCGGTAGTAGGGTTCGGAAGGGAGGGGTCATTTCGG...GGATCC insertion  
TCTAGA...GGACTTTTGGGATAATGGGTCTCCATCCGGTAAAACAAACA--TGAAGGGAGGGGCCA----GGATCC mutation  
----- large deletion

**Supplementary Figure 5.** Sequences of G4 inserts in representative GCR clones. ClustalW alignment of the G4 insert sequences after

GCR assays in the strains indicated on the left relative to the original Chr I<sub>G4</sub> and Chr X<sub>G4</sub> sequences (underlined on left). The *Xba*I



and *Bam*HI sites used to clone the inserts into pRS415 (Supplementary Table 8) are highlighted in yellow and red, respectively; this ~200 bp region is within the ~1 kb region that was amplified by PCR prior to sequencing. The ellipses represent endogenous flanking sequences that were PCR amplified with the G4 motifs from *S. cerevisiae* genomic DNA, which was omitted to simply presentation of the data. The types of post-GCR alterations noted in the G4 motifs extended into these flanking sequences. The G4 motif begins and ends at the first and last underlined residues, respectively, in the Chr I<sub>G4</sub> and Chr X<sub>G4</sub> sequences. In the original motifs, the underlined residues are predicted to participate in G-G base pairing to form the G4 structure; the Chr I<sub>G4</sub> forms on the complementary strand. In the mutated sequences, the underlined residues are no longer predicted to form G4 structures. The type of event that occurred at the G4 motif (*e.g.*, deletion or mutation) is indicated on the right. In the GCR clones, dashes represent deleted residues. In the original Chr I<sub>G4</sub> and Chr X<sub>G4</sub> sequences, dashes represent sites of insertions in one or more GCR clones.

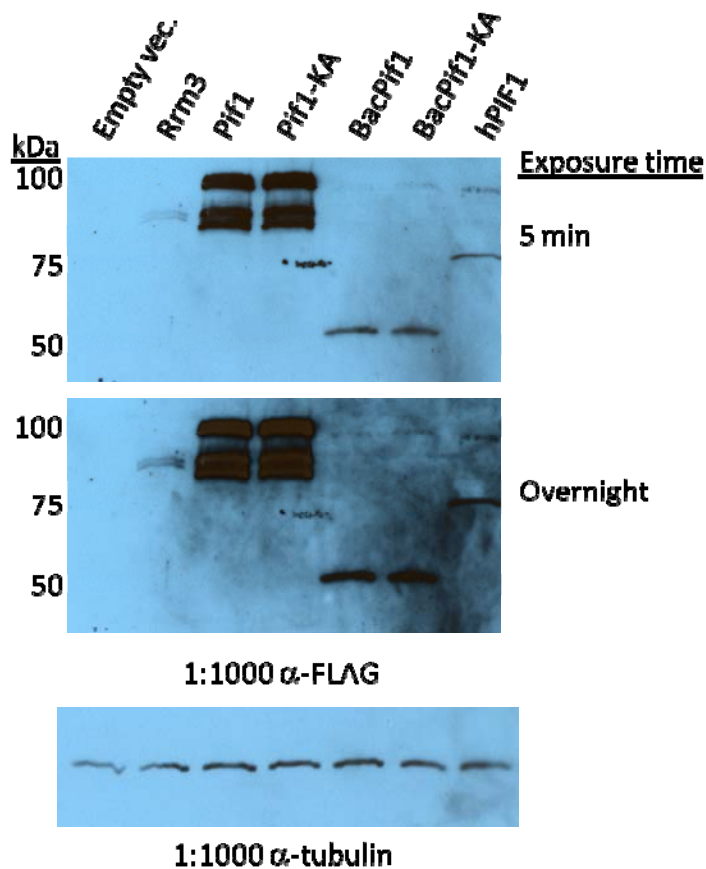

**Supplementary Figure 6.** Helicase expression in the *pif1-m2 rrm3Δ* + X<sub>G4</sub> strains. The various helicases were C-terminally tagged with 3xFLAG and expressed from a *TRP1*-marked *CEN* vector under the control of the *RRM3* promoter. Whole cell extracts were prepared, proteins were separated on an 8% polyacrylamide gel, transferred to nitrocellulose, and probed with an anti-FLAG antibody. The blot was then stripped and re-probed with an anti-tubulin antibody as a loading control. The expected molecular weights of the recombinant proteins are indicated. Three bands appear in the ScPif1 and ScPif1-KA lanes; the two lower molecular weight bands are likely degradation products from proteolysis of the N-terminus. Expected molecular weights: Rrm3, 84 kDa; Pif1 and Pif1-KA, 100 kDa; BacPif1 and BacPif1-KA, 52 kDa; and hPIF1, 75 kDa.

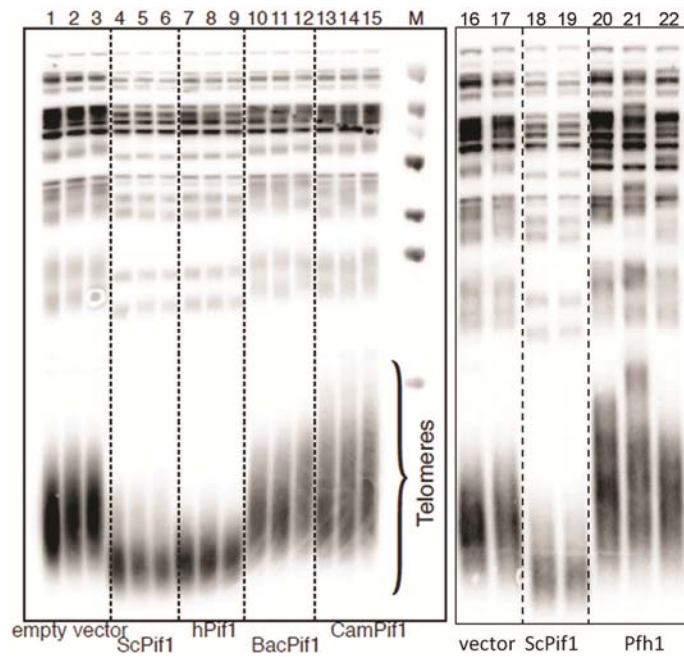

**Supplementary Figure 7.** Telomere length in *pif1-m2* cells heterologously expressing Pif1 family helicases. Full blot image of Southern blots shown in Figure 5c.

**Table S1.** Helicases tested for G4 DNA binding and unwinding.

| Enzyme                    | Species              | Type (polarity) | Protein length           | G4 binding             | G4 unwinding      | Reference(s)                    |
|---------------------------|----------------------|-----------------|--------------------------|------------------------|-------------------|---------------------------------|
| ATRX                      | Human                | DNA (N.D.)      | Full length              | Yes                    | N.D. <sup>1</sup> | 21                              |
| BLM                       | Human                | DNA (3'-5')     | Full length              | Yes (2.8) <sup>2</sup> | Yes               | 22-25                           |
| ChlR1/DDX11               | Human                | DNA (5'-3')     | Full length              | Yes (~2-8)             | Yes <sup>3</sup>  | 26                              |
| DHX9/NDH II/RHA           | Human                | RNA (3'-5')     | Full length              | N.D.                   | Yes               | 27                              |
| DnaB                      | <i>E. coli</i>       | DNA (5'-3')     | Full length              | N.D.                   | Yes               | M. Bochman, unpublished results |
| Dna2                      | <i>S. cerevisiae</i> | DNA (5'-3')     | Not described            | Yes                    | Yes               | 28                              |
| hDna2                     | Human                | DNA (5'-3')     | Not described            | Yes (~6)               | Yes               | 28                              |
| DNA helicase IV/nucleolin | Human                | Both (5'-3')    | 284-709/710 <sup>4</sup> | Yes ( $\geq 79$ )      | N.D. <sup>5</sup> | 29                              |
| FANCI                     | Human                | DNA (5'-3')     | Full length              | N.D.                   | Yes (~1-2)        | 30                              |
| gp41                      | phage T4             | DNA (5'-3')     | Full length              | N.D.                   | Yes               | M. Bochman, unpublished results |

<sup>1</sup> N.D. = not determined.

<sup>2</sup> The numbers in parentheses indicate the  $K_d$  (G4 binding) or  $K_M$  (G4 unwinding) in nM.

<sup>3</sup> Preferentially unwinds two-stranded antiparallel G2' G4 substrate relative to four-stranded parallel G4 substrate.

<sup>4</sup> Indicates the amino acids comprising the truncated polypeptide/total amino acids in the full-length protein.

<sup>5</sup> Hypothesized to induce G4 formation.

|                      |                                |                |                          |                          |                   |                                  |
|----------------------|--------------------------------|----------------|--------------------------|--------------------------|-------------------|----------------------------------|
| LTA <sub>g</sub>     | SV40                           | DNA (3'-5')    | Full length              | N.D.                     | Yes               | 31, 32                           |
| Pif1                 | <i>S. cerevisiae</i>           | DNA (5'-3')    | Full length <sup>6</sup> | Yes (~0.07-0.14)         | Yes (~0.01)       | <sup>33</sup> Current manuscript |
| hPIF1                | Human                          | DNA (5'-3')    | Full length <sup>6</sup> | Yes                      | Yes               | 34                               |
| RecBCD               | <i>E. coli</i>                 | DNA (bi-polar) | Full length              | N.D.                     | No <sup>7</sup>   | 23                               |
| RecQ                 | <i>E. coli</i>                 | DNA (3'-5')    | Full length              | N.D.                     | Yes               | 35                               |
| RecQ1                | Human                          | DNA (3'-5')    | 57-649/649               | Yes (1.8)                | No <sup>8</sup>   | 24                               |
| RHAU/DHX36/<br>G4R1  | Human                          | RNA            | Full length              | Yes (low pM to nM range) | Yes               | 36, 37                           |
| RHAU/CG9323          | <i>Drosophila melanogaster</i> | RNA            | Full length              | Yes                      | Yes               | 37                               |
| SARS cov<br>helicase | coronavirus                    | DNA            | Full length              | Yes                      | Yes               | 38                               |
| Sgs1                 | <i>S. cerevisiae</i>           | DNA (3'-5')    | Full length              | Yes <sup>9</sup>         | Yes <sup>10</sup> | Current manuscript               |
| Sgs1 truncation      | <i>S. cerevisiae</i>           | DNA (3'-5')    | 400-1268/1447            | Yes (5)                  | Yes               | 25                               |

<sup>6</sup> Nuclear isoform.

<sup>7</sup> Only tested on one G4 substrate (TP) but unwound forked and partial duplex DNAs under same reaction conditions.

<sup>8</sup> Inactive on G2' and parallel G4 substrates but active on forked and Holliday junction substrates.

<sup>9</sup> Binding is poor to three tested G4 substrates, precluding the accurate determination of a dissociation constant.

<sup>10</sup> G4 DNA unwinding is poor relative to unwinding of a forked DNA substrate.

|      |                      |             |             |      |     |                                    |
|------|----------------------|-------------|-------------|------|-----|------------------------------------|
| Srs2 | <i>S. cerevisiae</i> | DNA (3'-5') | 1-898/1174  | N.D. | Yes | M. Bochman,<br>unpublished results |
| WRN  | Human                | DNA (3'-5') | Full length | N.D. | Yes | 22, 27, 39                         |

---

**Table S2.** Sequences used in DNA binding and helicases assays.

| <b>G4 motif</b>       | <b><i>S. cerevisiae</i><br/>chromosome</b> | <b>Sequence (5'-3')</b>                                                                                                                                                                                                            |
|-----------------------|--------------------------------------------|------------------------------------------------------------------------------------------------------------------------------------------------------------------------------------------------------------------------------------|
| Poly(dA)              | N/A                                        | AAAAAAAAAAAAAAAAAAAAA                                                                                                                                                                                                              |
| Poly(dC)              | N/A                                        | CCCCCCCCCCCCCCCCCC                                                                                                                                                                                                                 |
| Poly(dG)              | N/A                                        | GGGGGGGGGGGGGGGGGG                                                                                                                                                                                                                 |
| Poly(dT)              | N/A                                        | TTTTTTTTTTTTTTTTTTTT                                                                                                                                                                                                               |
| G-rich                | N/A                                        | CGGCCCGGCGGTCCGCGGTC                                                                                                                                                                                                               |
| Non G-rich            | N/A                                        | CAAAGGACCCTTTGTGGATC                                                                                                                                                                                                               |
| rDNA <sub>G4</sub>    | XII                                        | GGGTAACGGGGAATAAGGGTTCGATTCCGGAGAGGG                                                                                                                                                                                               |
| TP <sub>G4</sub>      | N/A                                        | GGGGGAGCTGGGGTAGATGGGAATGTGAGGG                                                                                                                                                                                                    |
| Chr IV <sub>G4</sub>  | IV                                         | GGGGAGGGGAAGGGGAGGGG                                                                                                                                                                                                               |
| Chr IX <sub>G4</sub>  | IX                                         | GGGTACGGTGGGTAATAAGGGAAGGTATCGGG                                                                                                                                                                                                   |
| Chr X <sub>G4</sub>   | X                                          | GGGTCCTCCAAGCGGTAAACTTACATGGGATGGTGGGGTCACA                                                                                                                                                                                        |
| Chr XI <sub>G4</sub>  | XI                                         | TGGG                                                                                                                                                                                                                               |
| Chr XII <sub>G4</sub> | XII                                        | GGGCACGGGCACTCAATGGACGGGGTATCCACCCAGCTTGGAAA<br>GGGG                                                                                                                                                                               |
| Y-structure           | N/A                                        | GGGGTGGTGCTTCAGCCTGGGGTAACAAATCAAGTTGGGGCGGT<br>GCATCCACTTGGGCGTCGGG<br>Top =<br>TTTTTTTTTTTTTTTTTTTTTTTTTTTTTTTTTTGACGCTGCCGAATTCTG<br>GCTTGCT<br>Bottom =<br>TGAGTGAGCAAGCCAGAATTCGGCAGCGTCTTTTTTTTTTTTTTTTT<br>TTTTTTTTTTTTTTTT |

Tested G4 motifs are from the *S. cerevisiae* genome<sup>10,19</sup> except G4-TP. G4-TP is a well-characterized four-stranded parallel G4 DNA substrate derived from a mouse immunoglobulin locus<sup>23</sup>. All G4 substrates contained either a 5' or 3' 10-nt poly(dA) tail (not shown) for ScPif1 or Sgs1 experiments, respectively. The Y-structure substrate was prepared by annealing the top and bottom oligonucleotides listed above and filling in the top strand with  $\alpha^{32}\text{P}$ -dCTP and unlabeled dATP, dGTP, and dTTP using Klenow Fragment (3'→5' exo<sup>-</sup>) (NEB).

**Table S3.** Sequences used in GCR assays.

| <b>G4 motif</b> | <b><i>S. cerevisiae</i><br/>chromosome</b> | <b>Sequence (5'-3')</b>                                           |
|-----------------|--------------------------------------------|-------------------------------------------------------------------|
| I <sub>G4</sub> | I                                          | CCCAACAATTATCTCAAAATTCCCCAATTCTCATCAGTAACACC<br>CCACCCC           |
| X <sub>G4</sub> | X                                          | GGTGGGTAATAAGGGAAGGTATCGGGATTGGGG                                 |
| NG              | VII                                        | CTAATCTTTCAGCGTTGTAAATGTTGGTACCCAAACCCAATTGTC<br>TACAAGTTTCCTTAGC |
| GR              | I                                          | ATGGTGGTCATCTCAGTAGATGTAGAGGTGAAAGTACCGGTCCA<br>TGGCTCGGT         |



**Table S4.** Yeast strains

| Strain | Genotype                                                                                                                                                                         | Reference or source |
|--------|----------------------------------------------------------------------------------------------------------------------------------------------------------------------------------|---------------------|
| YPH500 | <i>MAT<math>\alpha</math> ura3-52 lys2-801 ade2-101 trp1<math>\Delta</math>63 his3<math>\Delta</math>200 leu2<math>\Delta</math>1</i>                                            | <sup>1</sup>        |
| YPH499 | <i>MAT<math>\alpha</math> ura3-52 lys2-801 ade2-101 trp1<math>\Delta</math>63 his3<math>\Delta</math>200 leu2<math>\Delta</math>1</i>                                            | <sup>1</sup>        |
| KP359  | <i>MAT<math>\alpha</math> ura3-52 lys2-801 ade2-101 trp1<math>\Delta</math>63 his3<math>\Delta</math>200 leu2<math>\Delta</math>1</i><br><i>Rrm3-MYC13::TRP1 pif1-m2</i>         | This study          |
| KP349  | <i>MAT<math>\alpha</math> ura3-52 lys2-801 ade2-101 trp1<math>\Delta</math>63 his3<math>\Delta</math>200 leu2<math>\Delta</math>1</i><br><i>Rrm3-MYC13::HIS3</i>                 | This study          |
| KP448  | <i>MAT<math>\alpha</math>/<math>\alpha</math> ura3-52 lys2-801 ade2-101 trp1<math>\Delta</math>63 his3<math>\Delta</math>200 leu2<math>\Delta</math>1</i><br><i>PIF1/pif1-m2</i> | This study          |

**Table S5.** *Saccharomyces cerevisiae* strains used for gross-chromosomal rearrangement assays.

| <b>Strain</b> | <b>Gene(s) of interest</b> | <b>Insert</b> | <b>Plasmid</b> |
|---------------|----------------------------|---------------|----------------|
| MBY49         | WT                         | No insert     | -              |
| KP296         | WT                         | G4-I          | -              |
| KP327         | WT                         | G4-X          | -              |
| KP298         | WT                         | G-rich        | -              |
| KP299         | WT                         | Non-G-rich    | -              |
| KP313         | <i>pif1-m2</i>             | No insert     | -              |
| KP323         | <i>pif1-m2</i>             | G4-I          | -              |
| KP322         | <i>pif1-m2</i>             | G4-X          | -              |
| KP330         | <i>pif1-m2</i>             | G-rich        | -              |
| KP329         | <i>pif1-m2</i>             | Non-G-rich    | -              |
| MBY79         | <i>rrm3</i> Δ              | No insert     | -              |
| KP304         | <i>rrm3</i> Δ              | G4-I          | -              |
| KP328         | <i>rrm3</i> Δ              | G4-X          | -              |
| KP332         | <i>rrm3</i> Δ              | G-rich        | -              |
| KP331         | <i>rrm3</i> Δ              | Non-G-rich    | -              |
| MBY132        | <i>sgs1</i> Δ              | No insert     | -              |
| KP314         | <i>sgs1</i> Δ              | G4-I          | -              |
| KP324         | <i>sgs1</i> Δ              | G4-X          | -              |
| KP311         | <i>pif1-m2 rrm3</i> Δ      | No insert     | -              |
| KP325         | <i>pif1-m2 rrm3</i> Δ      | G4-I          | -              |
| KP326         | <i>pif1-m2 rrm3</i> Δ      | G4-X          | -              |
| KP334         | <i>pif1-m2 rrm3</i> Δ      | G-rich        | -              |

|        |                      |            |                      |
|--------|----------------------|------------|----------------------|
| KP333  | <i>pif1-m2 rrm3Δ</i> | Non-G-rich | -                    |
| KP351  | <i>pif1-m2 sgs1Δ</i> | No insert  | -                    |
| KP352  | <i>pif1-m2 sgs1Δ</i> | G4-I       | -                    |
| KP353  | <i>pif1-m2 sgs1Δ</i> | G4-X       | -                    |
| MBY225 | <i>pif1-m2 rrm3Δ</i> | G4-X       | pMB13 (empty vector) |
| MBY222 | <i>pif1-m2 rrm3Δ</i> | G4-X       | pMB282 (ScPif1)      |
| MBY223 | <i>pif1-m2 rrm3Δ</i> | G4-X       | pMB283 (ScPif1-KA)   |
| MBY224 | <i>pif1-m2 rrm3Δ</i> | G4-X       | pMB274 (Rrm3)        |
| MBY194 | <i>pif1-m2 rrm3Δ</i> | G4-X       | pMB272 (Pfh1)        |
| MBY233 | <i>pif1-m2 rrm3Δ</i> | G4-X       | pMB292 (hPIF1)       |
| MBY213 | <i>pif1-m2 rrm3Δ</i> | G4-X       | pMB270 (BacPif1)     |
| MBY217 | <i>pif1-m2 rrm3Δ</i> | G4-X       | pMB288 (BacPif1-KA)  |
| MBY252 | <i>pif1-m2 rrm3Δ</i> | G4-X       | pMB267 (BdePif1)     |
| MBY250 | <i>pif1-m2 rrm3Δ</i> | G4-X       | pMB289 (BifPif1)     |
| MBY209 | <i>pif1-m2 rrm3Δ</i> | G4-X       | pMB303 (CamPif1)     |
| MBY251 | <i>pif1-m2 rrm3Δ</i> | G4-X       | pMB304 (V99B1Pif1)   |
| MBY221 | <i>pif1-m2 rrm3Δ</i> | G4-X       | pMB305 (PsyPif1)     |

---

\*All tested inserts (~200-250 bp) were identified as regions with strong Pif1 binding<sup>19</sup>. G4-I, G4 motif from chromosome I; G4-X, G4 motif from chromosome X; G-rich, G-rich sequence from chromosome I; Non-G-rich, non-G-rich sequence from chromosome VII.

**Table S6.** Oligonucleotides used for cloning.

## A) Oligonucleotides used for gross-chromosomal rearrangement strain construction.

| <b>Modification</b>           | <b>Oligo</b> | <b>Sequence (5'-3')</b>                                                                        |
|-------------------------------|--------------|------------------------------------------------------------------------------------------------|
| <i>hxt13::URA3</i>            | MB262        | GCACGTAAGGCATAACAATCAAAAAAAGAAAAAAGAAA<br>CAAAAGTTAAACCAAAAAAACAACAGCTGAAGCTTCGT<br>ACGC       |
|                               | MB277        | CACATTATTATGTAAACTATAATATAACAATGTTGCCTATC<br>AAGACAAACATATGCACTCTATGACATAGGCCACTAGTG<br>GATCTG |
| <i>rrm3::HIS3MX6</i>          | MB30         | GAACAAGCTCAAAGTCGAGAGATTTGTTCTTATAAGAC<br>ATCCCGCGGATCCCGGGTTAATTAA                            |
|                               | MB31         | GAAAAGAAAACCTTCAACTAGAGTATATGCATTTATTCGTT<br>GCAAGGAATTCGAGCTCGTTTAAAC                         |
| <i>sgs1::his5<sup>+</sup></i> | MB32         | TGTTGTATATATTTAAAAAATCATAACACGTACACACAAGG<br>CGGTACAGCTGAAGCTTCGTACGC                          |
|                               | MB33         | GAATGGTGTCTAGTTATAAGTAACACTATTTATTTTTCT<br>ACTCTCGTATCCGGTGATCACCTAGAC                         |
| <i>prb1::insert</i>           | KP321f       | CAAACCTAAGAGTCCAATTAGCTTCATCGCCAATAAAAA<br>AACAAACTAAACCTAATTCTAACA                            |
|                               | KP321r       | TTGTAACCTCGAGACGCCTAAGGAAAGAAAAAGAAAAA<br>AAAAGCAGCTGAAATTTTTCTAAA                             |

\*The definitions of G4-I, G4-X, G-rich, and Non-G-rich are the same as in Tables S2 and 3.

## B) Prokaryotic Pif1 cloning primers.

| <b>Species (helicase, accession #)</b>                                                | <b>Oligo</b> | <b>Sequence (5'-3')*</b>                                        |
|---------------------------------------------------------------------------------------|--------------|-----------------------------------------------------------------|
| <i>Bacteroides</i> sp. 2_1_16<br>(BacPif1, GG705209)                                  | MB215        | CGGGATCCATGGAAGATATGATTTTGACAGA<br>AGAGATGCAAAAAATAATGAATCTC    |
|                                                                                       | MB216        | GATCCGCTCGAGATCTAACCGTTTACCATAA<br>TAGTTACCTTCTGATTTGTATGCCC    |
| <i>Bdellovibrio bacteriovorus</i><br>HD100 (BdePif1, BX842655)                        | MB211        | CTGAAGATCTATGAATTCAGAGTCCAAATGC<br>TATCGTTTTTATATTTGCTTCGC      |
|                                                                                       | MB212        | GATCCGCTCGAGAAGACCTTCAAACCTGCTTA<br>TAAAAATGCAAACTTTTGGATCG     |
| <i>Campylobacter jejuni</i> subsp.<br><i>jejuni</i> NCTC 11168 (CamPif1,<br>AL111168) | MB196        | CGGGATCCATGTTTGATAAACTAGAAAAAAT<br>TTTAGCTTATGATAATGTTTTTTAAGTG |
|                                                                                       | MB198        | GATCCGCTCGAGGATTTGTTCTTGTATTTTCG                                |

|                                                          |       | AGATCTAAAAAATTATGTTTTTT                                |
|----------------------------------------------------------|-------|--------------------------------------------------------|
| <i>Escherichia coli</i> phage rv5<br>(rv5Pif1, DQ832317) | MB427 | <u>CGGGATCC</u> GAAAAAGGGCAGTATGATGTAG<br>GCACAGATGC   |
|                                                          | MB428 | GATCCGCT <u>CGAGT</u> ACGTCCCCCTCTTCTGCT<br>CTGGTTTC   |
| <i>Psychrobacter</i> sp. PRwf-1<br>(PsyPif1, CP000713)   | MB455 | CAGTCG <u>ATTAAT</u> ATGGGATCCAAACAAGCG<br>ACCGCACTGG  |
|                                                          | MB457 | GATCCGCT <u>CGAGAT</u> CAATAAAGACAAGCGC<br>TAAGCGGATGG |

\*Restriction sites used to clone into the *Bam*HI and *Xho*I sites of the expression plasmids are underlined.

**Table S7.** Multiplex PCR primers.

| <b>Primer pair</b>   | <b>Sequences (5'-&gt;3')</b>                  | <b>Expected PCR product size (bp)</b> |
|----------------------|-----------------------------------------------|---------------------------------------|
| PCM1 For             | CGATGAAGGTTGATTACGAGC                         | 615                                   |
| PCM1 Internal Rev    | GAAGGCTCCTATAAAGAACG                          |                                       |
| IG SOM1 Rev          | CGAGGTCACGGACACATATACC                        |                                       |
| MB634                | GACACGAAATTACAAAATGGAATATGTTC<br>ATAGGGTAGACG | 500                                   |
| *Internal CIN8 Rev   | GAAAATCGACATAATAAGAGTAGATTTC                  | 414                                   |
| Internal CIN8 For    | GATTTGCGATAGCGTCGCTGCC                        |                                       |
| Internal NPR2 Rev2   | CTTAGTTTAGAAATTTTGGCAATG                      | Rev2+Inside=340                       |
| Inside Hot Spot For  | GAAAAGGATACAAAGGATATGAG                       | Rev2+Outside=451                      |
| Outside Hot Spot Rev | GTTTTCTTCGATTTGAAGGTGTTGG                     |                                       |
| IG before CAN1 For   | GAGTTTGCTAGATTCATAAAAAGCC                     | 241                                   |
| IG before CAN1 Rev   | CCGATAATGTCTGAGTTAGGTGAG                      |                                       |

\*The PCR product generated by the *CIN8* primer pair was used as the probe for the Southern blots in Fig. 3.

**Table S8.** Plasmids

| Name                | Feature(s) of interest                                                            | Reference or source |
|---------------------|-----------------------------------------------------------------------------------|---------------------|
| pFA6a-Myc13-His3MX6 | 13xMyc, <i>HIS3</i>                                                               | 5                   |
| pET28b-Pif1-His     | <i>Saccharomyces cerevisiae PIF1</i>                                              | 40                  |
| pFB-MBP-SGS1-His    | <i>S. cerevisiae SGS1</i>                                                         | 7                   |
| pUC19+Bd3546 (for)  | <i>Bdellovibrio bacteriovorus</i> Pif1                                            | This study*         |
| pMB116              | N-terminal 4xStrepII tag, C-terminal 6xHis tag                                    | This study          |
| pMB131 <sup>a</sup> | <i>Bacteroides</i> sp. 2_1_16 Pif1                                                | This study          |
| pMB142 <sup>a</sup> | <i>B. bacteriovorus</i> Pif1                                                      | This study          |
| pMB135 <sup>a</sup> | <i>Campylobacter jejuni</i> Pif1                                                  | This study          |
| pMB226 <sup>a</sup> | <i>Escherichia coli</i> phage rv5 Pif1                                            | This study          |
| PMB241 <sup>a</sup> | <i>Psychrobacter</i> sp. PRwf-1 Pif1                                              | This study          |
| pUG72               | <i>URA3</i>                                                                       | 4                   |
| pFA6a-His3MX6       | <i>HIS3</i>                                                                       | 5                   |
| pUG27               | <i>his5</i> <sup>+</sup>                                                          | 4                   |
| pRS415              | CEN <i>LEU2</i>                                                                   | 1                   |
| KP114 <sup>b</sup>  | G4 Chr I                                                                          | This study          |
| KP118 <sup>b</sup>  | G4 Chr X                                                                          | This study          |
| KP116 <sup>b</sup>  | GR Chr I                                                                          | This study          |
| KP117 <sup>b</sup>  | Chr VII                                                                           | This study          |
| pMB258              | <i>CEN1</i> , <i>TRP1</i> , <i>RRM3</i> promoter, C-terminal 3xFLAG               | This study          |
| pMB282 <sup>c</sup> | <i>S. cerevisiae PIF1</i>                                                         | This study          |
| pMB307 <sup>c</sup> | <i>CEN1</i> , <i>TRP1</i> , <i>PIF1</i> promoter, <i>PIF1</i> , C-terminal 3xFLAG | This study          |
| pMB283 <sup>c</sup> | <i>S. cerevisiae pif1</i> -K264A                                                  | This study          |
| pMB274 <sup>c</sup> | <i>S. cerevisiae RRM3</i>                                                         | This study          |
| pMB272 <sup>c</sup> | <i>Schizosaccharomyces pombe pfh1</i> <sup>+</sup>                                | This study          |
| pMB292 <sup>c</sup> | <i>Homo sapiens PIF1</i>                                                          | This study          |
| pMB270 <sup>c</sup> | <i>Bacteroides</i> sp. 2_1_16 Pif1                                                | This study          |
| pMB288 <sup>c</sup> | <i>Bacteroides</i> sp. 2_1_16 Pif1-KA                                             | This study          |
| pMB267 <sup>c</sup> | <i>C. jejuni</i> Pif1                                                             | This study          |
| pMB289 <sup>c</sup> | <i>P. sp.</i> PRwf-1 Pif1                                                         | This study          |
| pMB303 <sup>c</sup> | <i>B. infantis</i> Pif1                                                           | This study          |
| pMB304 <sup>c</sup> | <i>Emiliana huxleyi</i> Virus 99B1 Pif1                                           | This study          |
| pMB305 <sup>c</sup> | <i>B. bacteriovorus</i> Pif1                                                      | This study          |
| pMB348 <sup>d</sup> | <i>Schizosaccharomyces pombe</i> Pfh1                                             | This study          |
| pMB363 <sup>d</sup> | <i>S. pombe</i> Pfh1-KA                                                           | This study          |

<sup>a</sup> Plasmid backbone = pMB116.

<sup>b</sup> Plasmid backbone = pRS415.

<sup>c</sup> Plasmid backbone = pRS258.

<sup>d</sup> Plasmid backbone = pRS424.

\*A gift from Elizabeth Sockett (University of Nottingham).



## References

1. Sikorski, R.S. & Hieter, P. A system of shuttle vectors and yeast host strains designed for efficient manipulation of DNA in *Saccharomyces cerevisiae*. *Genetics* **122**, 19-27 (1989).
2. Schulz, V.P. & Zakian, V.A. The *Saccharomyces PIF1* DNA helicase inhibits telomere elongation and *de novo* telomere formation. *Cell* **76**, 145-155 (1994).
3. Azvolinsky, A., Dunaway, S., Torres, J., Bessler, J. & Zakian, V.A. The *S. cerevisiae* Rrm3p DNA helicase moves with the replication fork and affects replication of all yeast chromosomes. *Genes Dev* **20**, 3104-3116 (2006).
4. Gueldener, U., Heinisch, J., Koehler, G.J., Voss, D. & Hegemann, J.H. A second set of loxP marker cassettes for Cre-mediated multiple gene knockouts in budding yeast. *Nucleic Acids Res* **30**, e23 (2002).
5. Longtine, M.S. et al. Additional modules for versatile and economical PCR-based gene deletion and modification in *Saccharomyces cerevisiae*. *Yeast* **14**, 953-961 (1998).
6. Boule, J.B. & Zakian, V.A. The yeast Pif1p DNA helicase preferentially unwinds RNA DNA substrates. *Nucleic Acids Res* **35**, 5809-5818 (2007).
7. Cejka, P. & Kowalczykowski, S.C. The full-length *Saccharomyces cerevisiae* Sgs1 protein is a vigorous DNA helicase that preferentially unwinds holliday junctions. *The Journal of biological chemistry* **285**, 8290-301 (2010).
8. Harmon, F.G. & Kowalczykowski, S.C. RecQ helicase, in concert with RecA and SSB proteins, initiates and disrupts DNA recombination. *Genes Dev* **12**, 1134-1144 (1998).
9. Studier, F.W. Protein production by auto-induction in high density shaking cultures. *Protein expression and purification* **41**, 207-34 (2005).
10. Capra, J.A., Paeschke, K., Singh, M. & Zakian, V.A. G-quadruplex DNA sequences are evolutionarily conserved and associated with distinct genomic features in *Saccharomyces cerevisiae*. *PLoS Comput Biol* **6**, e1000861 (2010).
11. Bachrati, C.Z. & Hickson, I.D. Analysis of the DNA unwinding activity of RecQ family helicases. *Methods Enzymol* **409**, 86-100 (2006).
12. Wong, I. & Lohman, T.M. A double-filter method for nitrocellulose-filter binding: application to protein-nucleic acid interactions. *Proc Natl Acad Sci U S A* **90**, 5428-32 (1993).
13. Brosh, R.M., Jr., Opresko, P.L. & Bohr, V.A. Enzymatic mechanism of the WRN helicase/nuclease. *Methods in enzymology* **409**, 52-85 (2006).
14. Putnam, C.D. & Kolodner, R.D. Determination of gross chromosomal rearrangement rates. *Cold Spring Harbor protocols* **2010**, pdb prot5492 (2010).
15. Hall, B.M., Ma, C.X., Liang, P. & Singh, K.K. Fluctuation analysis CalculatOR: a web tool for the determination of mutation rate using Luria-Delbruck fluctuation analysis. *Bioinformatics* **25**, 1564-5 (2009).
16. Kushnirov, V.V. Rapid and reliable protein extraction from yeast. *Yeast* **16**, 857-60 (2000).
17. Runge, K.W. & Zakian, V.A. Introduction of extra telomeric DNA sequences into *Saccharomyces cerevisiae* results in telomere elongation. *Mol. Cell. Biol.* **9**, 1488-1497 (1989).
18. Azvolinsky, A., Giresi, P., Lieb, J. & Zakian, V. Highly transcribed RNA polymerase II genes are impediments to replication fork progression in *Saccharomyces cerevisiae*. *Mol Cell* **34**, 722-734 (2009).

19. Paeschke, K., Capra, J.A. & Zakian, V.A. DNA Replication through G-Quadruplex Motifs Is Promoted by the *Saccharomyces cerevisiae* Pif1 DNA Helicase. *Cell* **145**, 678-91 (2011).
20. Livak, K.J. & Schmittgen, T.D. Analysis of relative gene expression data using real-time quantitative PCR and the 2(-Delta Delta C(T)) Method. *Methods* **25**, 402-8 (2001).
21. Law, M.J. et al. ATR-X syndrome protein targets tandem repeats and influences allele-specific expression in a size-dependent manner. *Cell* **143**, 367-78 (2010).
22. Mohaghegh, P., Karow, J.K., Brosh Jr, R.M., Jr., Bohr, V.A. & Hickson, I.D. The Bloom's and Werner's syndrome proteins are DNA structure-specific helicases. *Nucleic Acids Res* **29**, 2843-2849 (2001).
23. Sun, H., Karow, J., Hickson, I. & Maizels, N. The Bloom's Syndrome Helicase Unwinds G4 DNA. *J. Biol. Chem.* **273**, 27587-27592 (1998).
24. Popuri, V. et al. The Human RecQ helicases, BLM and RECQ1, display distinct DNA substrate specificities. *J Biol Chem* **283**, 17766-17776 (2008).
25. Huber, M.D., Lee, D.C. & Maizels, N. G4 DNA unwinding by BLM and Sgs1p: substrate specificity and substrate-specific inhibition. *Nucl Acids Res.* **30**, 3954-3961 (2002).
26. Wu, Y., Sommers, J.A., Khan, I., de Winter, J.P. & Brosh, R.M., Jr. Biochemical characterization of Warsaw breakage syndrome helicase. *The Journal of biological chemistry* **287**, 1007-21 (2012).
27. Chakraborty, P. & Grosse, F. Human DHX9 helicase preferentially unwinds RNA-containing displacement loops (R-loops) and G-quadruplexes. *DNA repair* **10**, 654-65 (2011).
28. Masuda-Sasa, T., Polaczek, P., Peng, X.P., Chen, L. & Campbell, J.L. Processing of G4 DNA by Dna2 helicase/nuclease and replication protein A (RPA) provides insights into the mechanism of Dna2/RPA substrate recognition. *J Biol Chem* **283**, 24359-24373 (2008).
29. Gonzalez, V., Guo, K., Hurley, L. & Sun, D. Identification and characterization of nucleolin as a c-myc G-quadruplex-binding protein. *The Journal of biological chemistry* **284**, 23622-35 (2009).
30. London, T.B. et al. FANCI is a structure-specific DNA helicase associated with the maintenance of genomic G/C tracts. *J Biol Chem* **283**, 36132-36139 (2008).
31. Baran, N., Pucshansky, L., Marco, Y., Benjamin, S. & Manor, H. The SV40 large T-antigen helicase can unwind four stranded DNA structures linked by G-quartets. *Nucleic acids research* **25**, 297-303 (1997).
32. Tuesuwan, B. et al. Simian virus 40 large T-antigen G-quadruplex DNA helicase inhibition by G-quadruplex DNA-interactive agents. *Biochemistry* **47**, 1896-909 (2008).
33. Ribeyre, C. et al. The yeast Pif1 helicase prevents genomic instability caused by G-quadruplex-forming CEB1 sequences *in vivo*. *PLoS Genet* **5**, e1000475 (2009).
34. Sanders, C.M. Human Pif1 helicase is a G-quadruplex DNA binding protein with G-quadruplex DNA unwinding activity. *Biochem J* (2010).
35. Wu, X. & Maizels, N. Substrate-specific inhibition of RecQ helicase. *Nucleic acids research* **29**, 1765-71 (2001).
36. Giri, B. et al. G4 resolvase 1 tightly binds and unwinds unimolecular G4-DNA. *Nucleic acids research* **39**, 7161-78 (2011).
37. Lattmann, S., Giri, B., Vaughn, J.P., Akman, S.A. & Nagamine, Y. Role of the amino terminal RHAU-specific motif in the recognition and resolution of guanine quadruplex-

- RNA by the DEAH-box RNA helicase RHAU. *Nucleic acids research* **38**, 6219-33 (2010).
38. Shum, K.T. & Tanner, J.A. Differential inhibitory activities and stabilisation of DNA aptamers against the SARS coronavirus helicase. *Chembiochem : a European journal of chemical biology* **9**, 3037-45 (2008).
  39. Fry, M. & Loeb, L.A. Human Werner syndrome DNA helicase unwinds tetrahelical structures of the fragile X syndrome repeat sequence d(CGG)<sub>n</sub>. *J. Biol. Chem.* **274**, 12797-12802 (1999).
  40. Boule, J., Vega, L. & Zakian, V. The Yeast Pif1p helicase removes telomerase from DNA. *Nature* **438**, 57-61 (2005).
